# Supplementary material for: Association between physical activity and diabetes control: multiple cross-sectional studies and a prospective study in a population-based, Swiss cohort
Source: PubMed Central journal article supplement (PMC11499834; doi:10.1136/bmjopen-2023-078929), 2024-10-21
Supplement: bmjopen-14-10-s001.pdf [file bmjopen-14-10-s001.pdf]

```

#####

#Loading packages

# USING THRESHOLDS AS DEFINED BY White and al. PMID 27936024)

# CHECK GGIR VERSION, IF NECESSARY INSTALL VERSION 9

#####

#install.packages(c("devtools"))

#require(devtools)

#install_version("GGIR", version="1.5-9")

#install.packages(c ("GENEAread", "zoo", "bitops", "data.table", "mmap"))

ev <- lapply("GGIR", library, character.only=T)

ev

search() # check if all is loaded

mode=c(1,2,3,4,5)

# Path for the folder where bin files are stored

datadir= "F:/DATA/Input"

#pathname to folder where output should be written to "

# Changed 17.08.2017 to have ndayswindow=14 and maxdur=0

outputdir="F:/DATA/Output"

studyname="COLAUS"

f0 = 1

f1 = 1 # f1 = c() for all

g.shell.GGIR (#-----

# General parameters

#-----

do.parallel = FALSE,

```

```
mode=mode,
datadir=datadir,
outputdir=outputdir,
studyname=studyname,
f0=f0,
f1=f1,
overwrite = TRUE,
do.imp=TRUE,
idloc=1,
print.filename=TRUE,
storefolderstructure = FALSE,
#-----
# Part 1 parameters:
#-----
windowsizes = c(5,900,3600),
#deziredtz="Europe/Bern",
do.cal=TRUE,
do.enmo = TRUE,
do.anglez=TRUE,
chunksize=1,
printsummary=TRUE,
#-----
# Part 2 parameters:
#-----
strategy = 1,
ndayswindow=14,
hrs.del.start = 1,
hrs.del.end = 1,
maxdur = 15,
includedaycrit = 16,
L5M5window = c(0,24),
```

```
M5L5res = 10,  
winhr = c(5),  
qllevels = c(c(1380/1440),c(1410/1440)),  
qwindow=c(0,24),  
ilevels = c(seq(0,400,by=50),8000),  
mvpathreshold =c(182),  
#-----  
# Part 3 parameters:  
#-----  
timethreshold= c(5),  
anglethreshold=5,  
ignorenonwear = TRUE,  
#-----  
# Part 4 parameters:  
#-----  
excludefirstlast = FALSE,  
includenightcrit = 16,  
def.noc.sleep = c(21,9),  
#loglocation= "pathname to a sleeplog - if using one",  
outliers.only = FALSE,  
criterror = 4,  
relyonsleeplog = FALSE,  
sleeplogidnum = TRUE,  
colid=1,  
coln1=2,  
do.visual = FALSE,  
nnights = 14,  
#-----  
# Part 5 parameters:  
#-----  
# Key functions: Merging physical activity with sleep analyses
```

```
#threshold.lig = c(30,40,50),
#threshold.mod = c(100,120),
#threshold.vig = c(400,500),
threshold.lig = c(85),
threshold.mod = c(181),
threshold.vig = c(437),
boutcriter = 0.8,
boutcriter.in = 0.9,
boutcriter.lig = 0.8,
boutcriter.mvpa = 0.8,
#boutdur.in = c(10,20,30),
#boutdur.lig = c(1,5,10),
#boutdur.mvpa = c(1,5,10),
boutdur.in = c(10),
boutdur.lig = c(10),
boutdur.mvpa = c(10),
timewindow = c("WW"),
#-----
# Report generation
#-----
do.report=c(5))
```
